# Supplementary material for: Processing Speed Impairment After Anterior Communicating Artery Aneurysm Rupture Assessed Using the Wechsler Adult Intelligence Scale: An Observational Study
Source: Research Square preprint supplement (doi:10.21203/rs.3.rs-8342255/v1), 2025-12-16
Supplement: Supplementary file 1 [file a1cb37f913136008a391ef2f.docx]

| Table 1 Patient characteristics |  |  |
| --- | --- | --- |
|  |  | n=29 |
| Sex | Male | 14(48.3%) |
|  | Female | 15(51.7%) |
| Age | Mean | 49.90±11.2 |
|  | Range | 25~78 |
| WFNS grade | Grade Ⅰ | 14(48.3%) |
|  | Grade Ⅱ | 6(20.1%) |
|  | Grade Ⅲ | 0(0.00%) |
|  | Grade Ⅳ | 5(17.2%) |
|  | Grade Ⅴ | 4(13.8%) |
| Aneurysm location | Anterior Communication Artery | 10(34.5%) |
|  | Internal Carotid Artery | 10(34.5%) |
|  | Middle Cerebral Artery | 3(10.3%) |
|  | Vertebral Artery | 3(10.3%) |
|  | Anterior Cerebral Artery | 1(3.4%) |
|  | Posterior Cerebral Artery | 1(3.4%) |
|  | Basilar Artery | 1(3.4%) |
| Treatment modality | Coil embolization | 21(72.4%) |
|  | Clipping | 8(27.6%) |
| Time from onset to assessment | Mean | 26.4±18.6 |
|  | Range | 10-78 |
